# Supplementary material for: Quantitative analysis of the splice variants expressed by the major hepatitis B virus genotypes
Source: PubMed Central journal article supplement (PMC8115900; doi:10.1099/mgen.0.000492), 2021-01-13
Supplement: mgen-7-492-s001.pdf [file mgen-7-492-s001.pdf]

## SUPPLEMENTARY MATERIALS

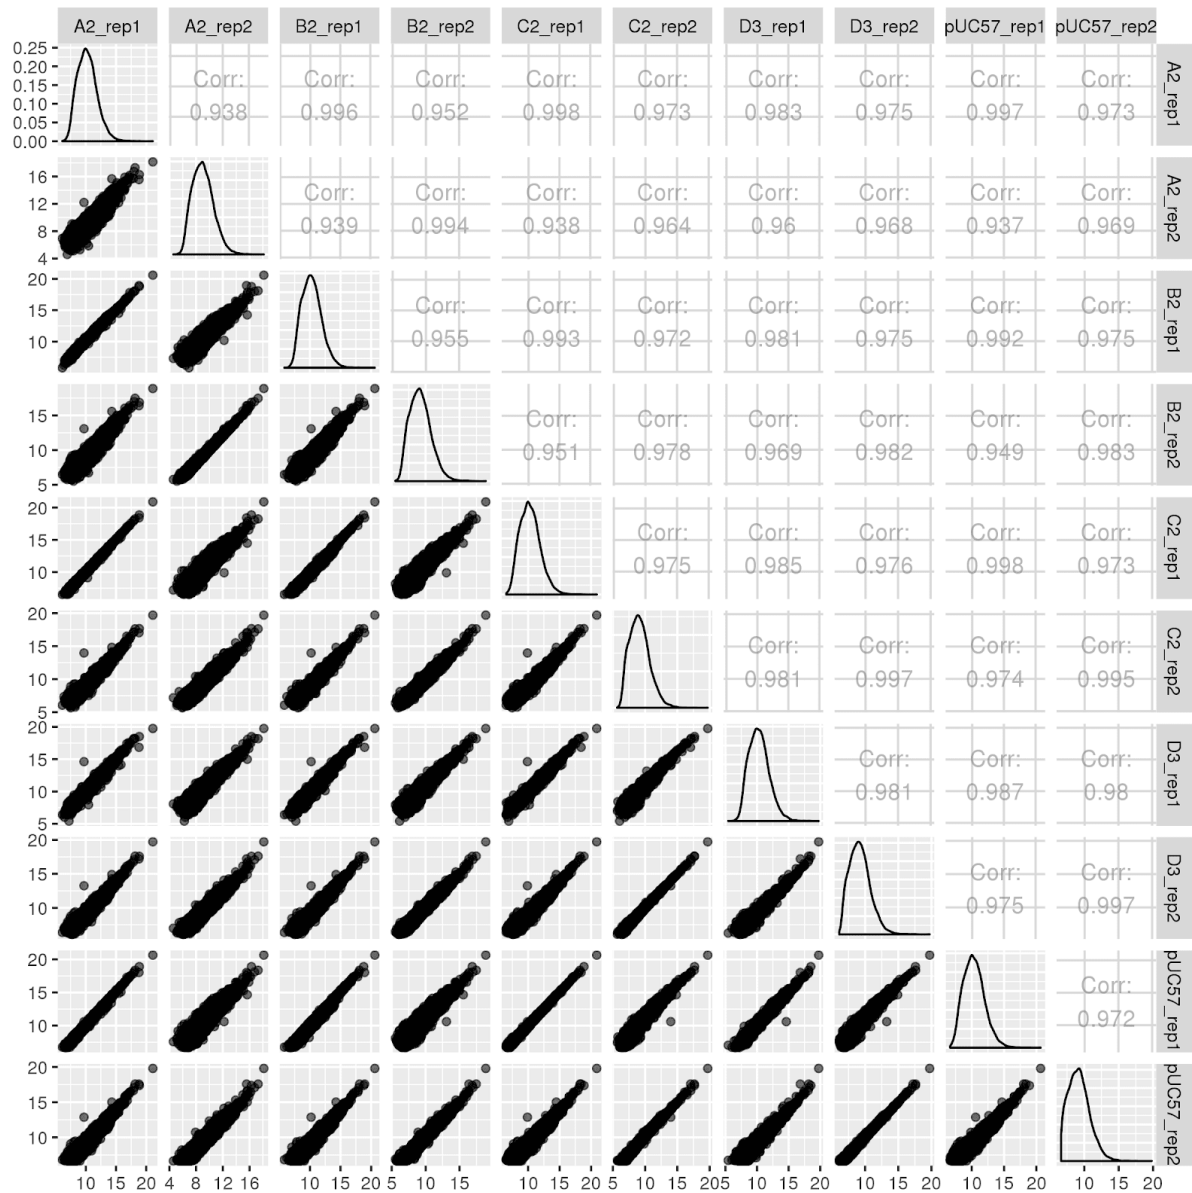

**Fig S1.** Correlation matrix plot of the RNA-seq read count data. Spearman correlations of  $>0.9$  between biological replicates indicate good reproducibility. However, the Spearman correlations between the biological replicates are weaker than those within the same batch (i.e. rep1 versus rep2  $<$  rep1 versus rep1, or rep2 versus rep2). This suggests that batch effects are present. rep, biological replicate.

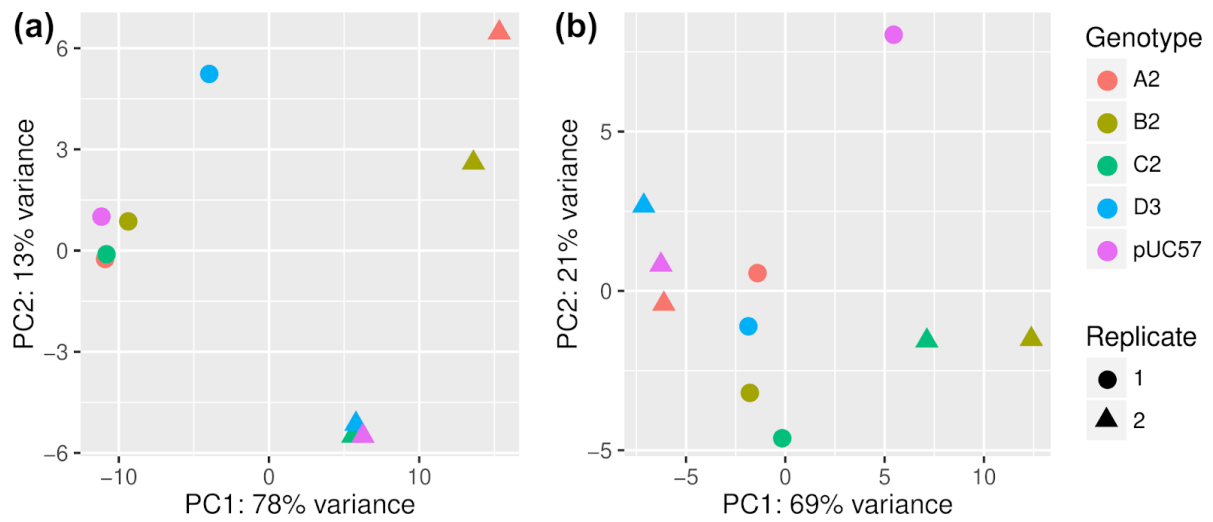

**Fig S2.** Batch effects in the RNA-seq experiments. (a) PCA plot shows that the replicates tend to be clustered by batch rather than genotype. (b) The read count data are distributed more randomly after a batch effect correction. PCA, principal component analysis.

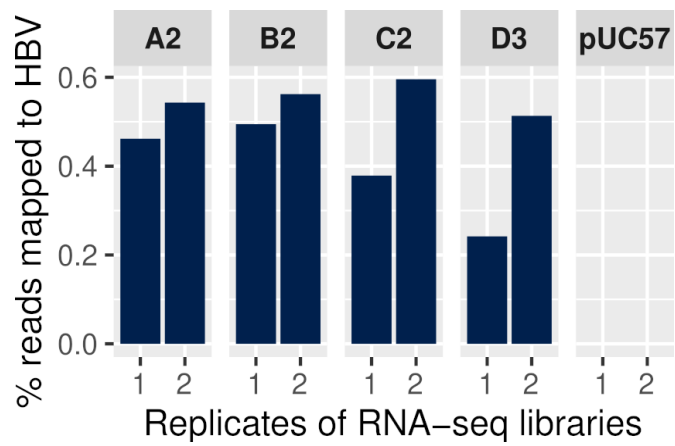

**Fig S3.** Proportions of the RNA-seq reads that were mapped to the HBV genomes by biological replicates. pUC57 empty plasmid was included as a control. See also Table S4 and the mapping statistics for the human genome in Table S2 and S3.

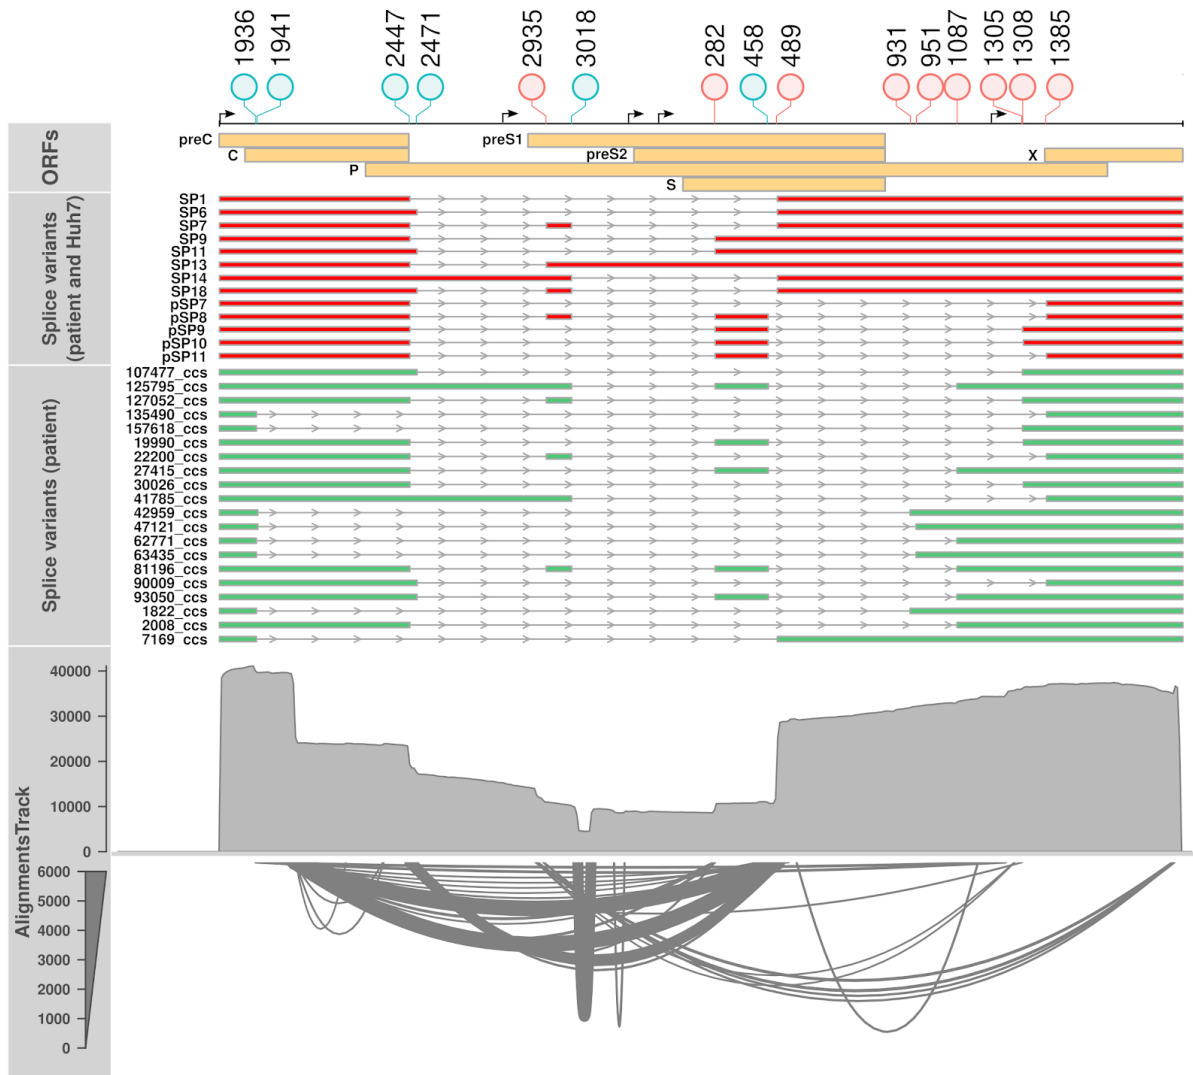

**Fig S4.** Known and novel HBV splice variants detected in a patient with chronic HBV infection. The HBV genomic DNAs were previously amplified from a patient's liver explant and blood samples and subjected to PacBio RS sequencing [1]. The publicly available CCS reads were used to identify splice variants (Methods). The splice variants labeled as pSP (putative splice variants) were detected in both the patient and HBV-transfected Huh7. They were also reproducibly detected across the independent biological replicates of this transfection experiment. The splice variants detected in the patient only are represented with PacBio CCS read names. Read coverage and splice graphs are shown in the bottom panel. CCS, Circular Consensus Sequencing.

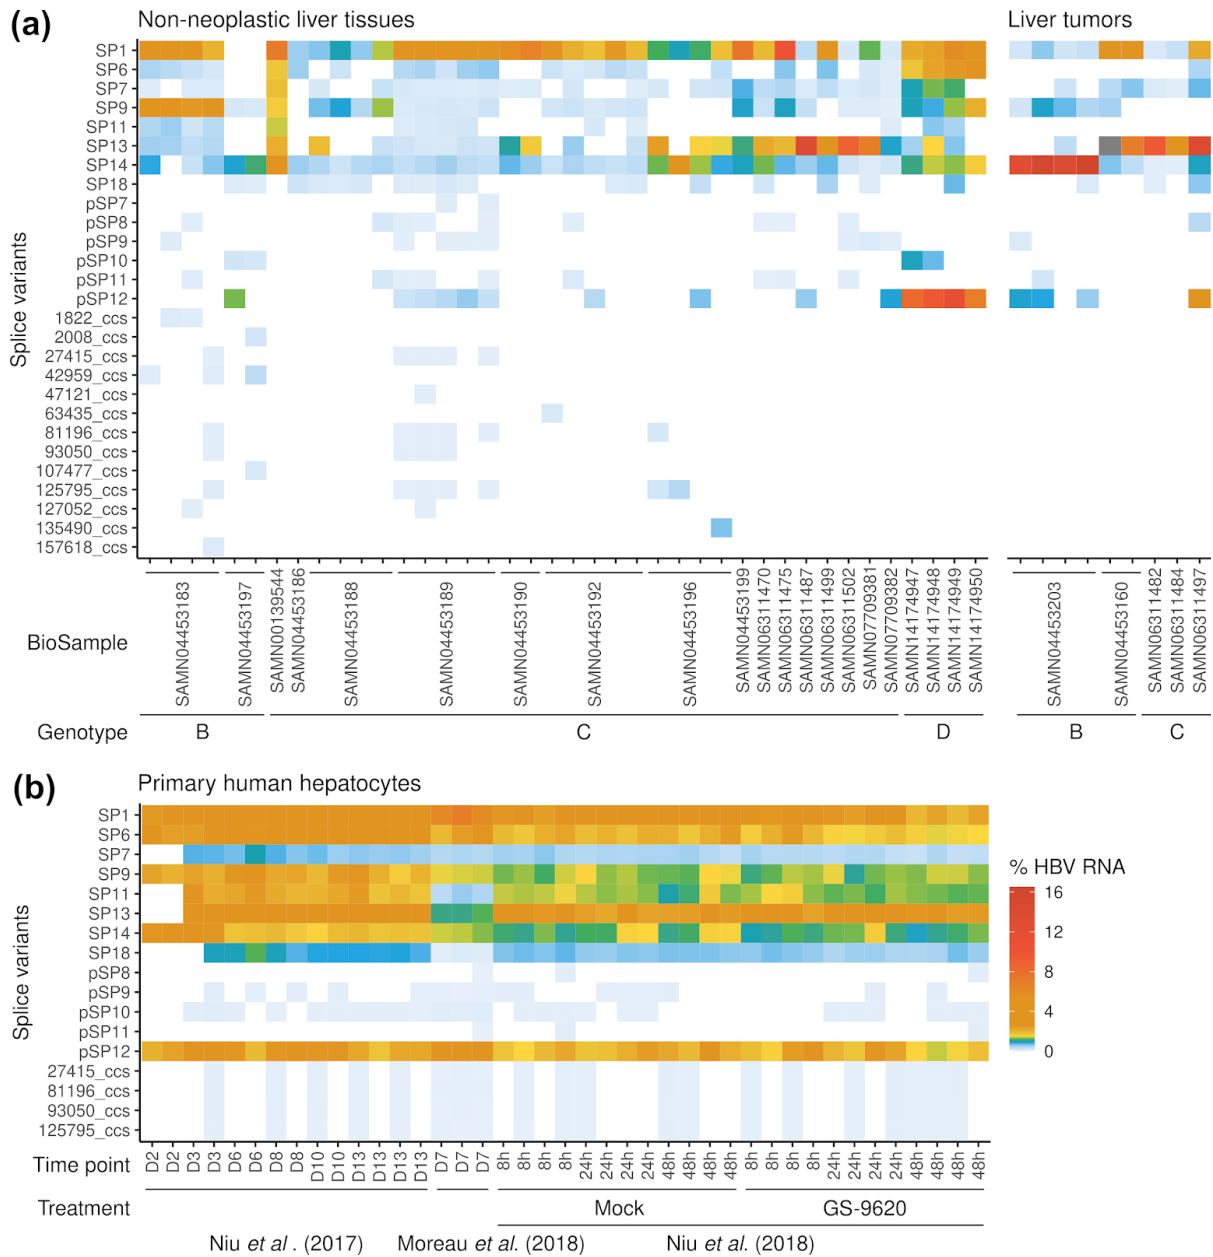

**Fig S5.** Expression profiles of HBV splice variants. The heatmaps show the percentages of splice variants in HBV RNAs in (a) HBV positive liver biopsy samples and (b) HBV-infected primary human hepatocytes. The RNA-seq libraries that had  $\geq 5$  splice variants are shown. SP and pSP denote the known and putative spliced pgRNAs, respectively. Other splice variants are represented with PacBio CCS read names (Methods). Mock indicates no GS-9620 treatment. CCS, Circular Consensus Sequencing.

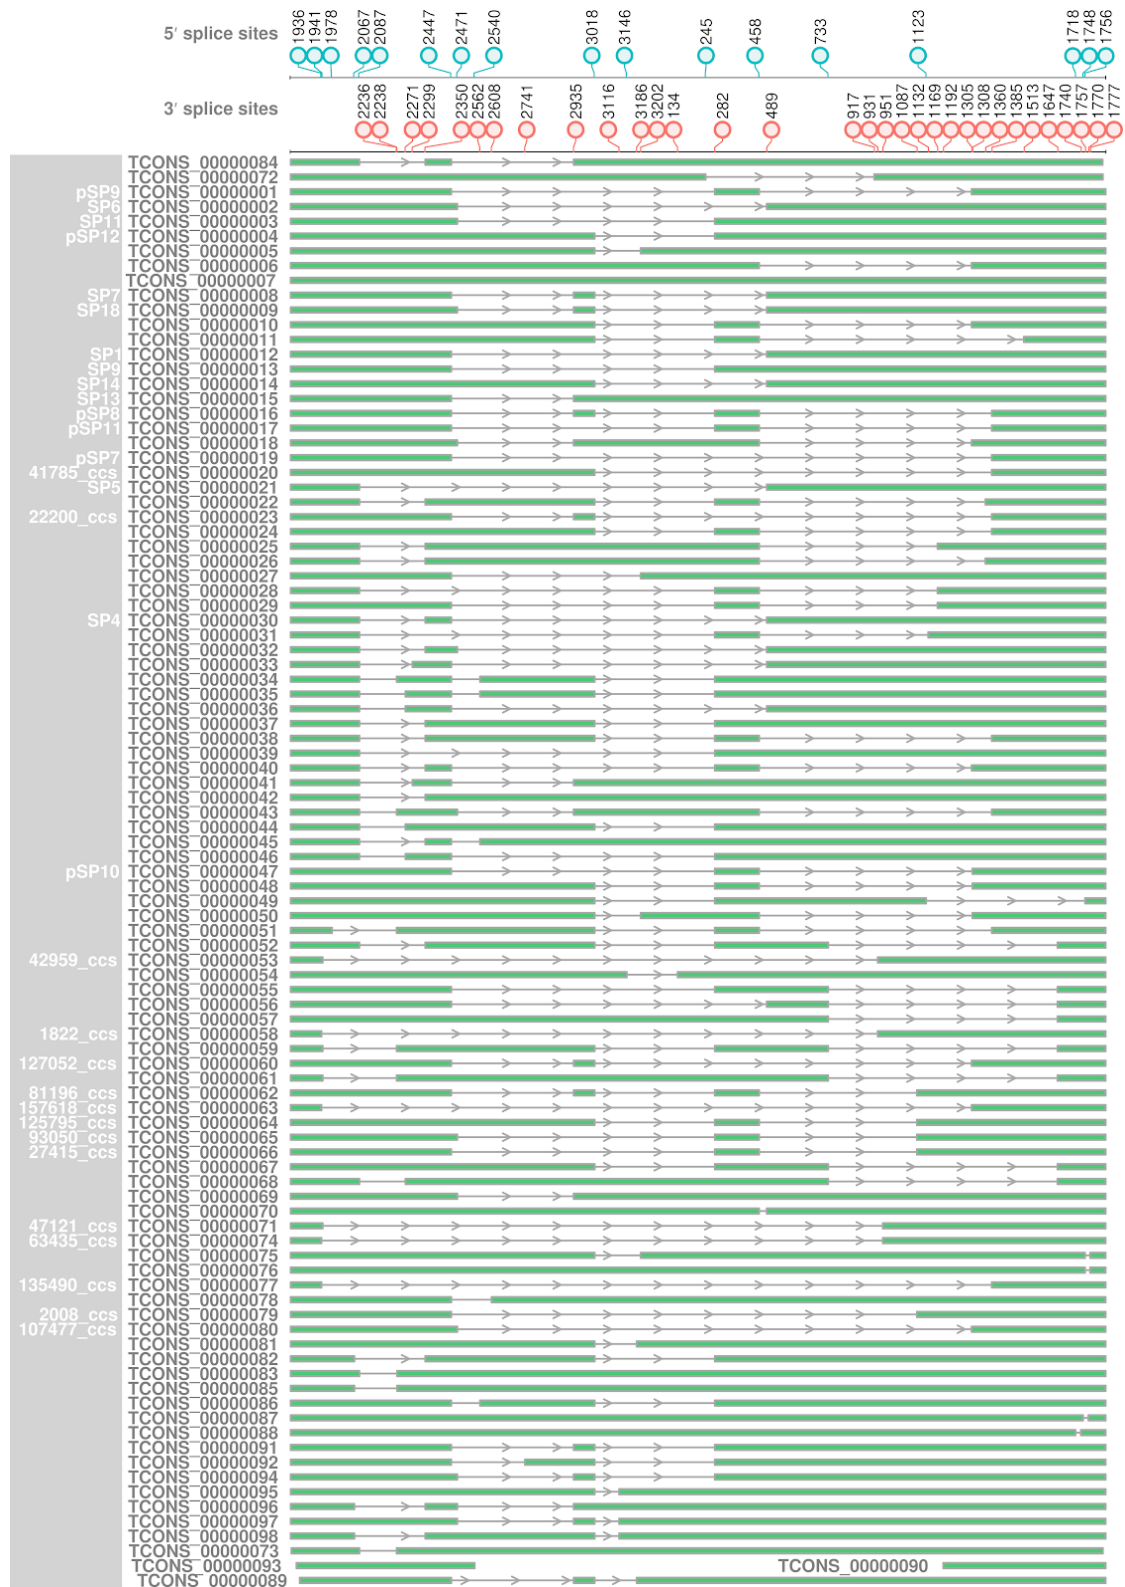

**Fig S6.** HBV transcripts assembled and detected in 513 RNA-seq libraries. This analysis included the 12 RNA-seq libraries of HBV-transfected Huh7 cells and 501 publicly available RNA-seq libraries of HBV positive biopsy samples of human liver tumors and non-neoplastic liver tissues, and PVTT (129, 182, and 92 libraries, respectively), as well as HBV-infected PHH (83 libraries) and human cultured cells HepaRG (4 libraries) and HepG2-NTCP (11 libraries). See also Table S1. PVTT, portal vein tumor thrombosis; PHH, primary human hepatocytes.

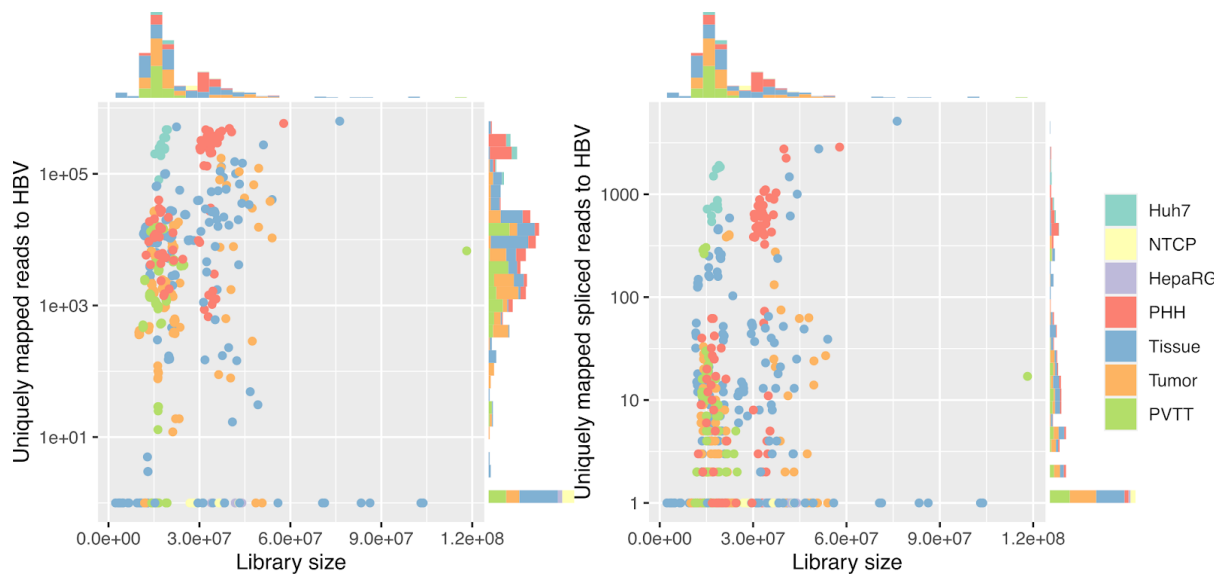

**Fig S7.** Weak correlation between the number of uniquely mapped reads to HBV and RNA-seq library size (Kendall's Tau = 0.20,  $p$ -value =  $5.6 \times 10^{-11}$ , left panel). The number of uniquely mapped, spliced reads to HBV also shows a weak correlation with library size (Kendall's Tau = 0.13,  $p$ -value =  $1.7 \times 10^{-5}$ , right panel). A pseudocount of 1 was added to read counts so that the y-axis can be shown in log-scale. A total of 78 and 185 of 501 public RNA-seq libraries lack uniquely mapped reads and spliced reads mapped to HBV, respectively. See also Table S6.

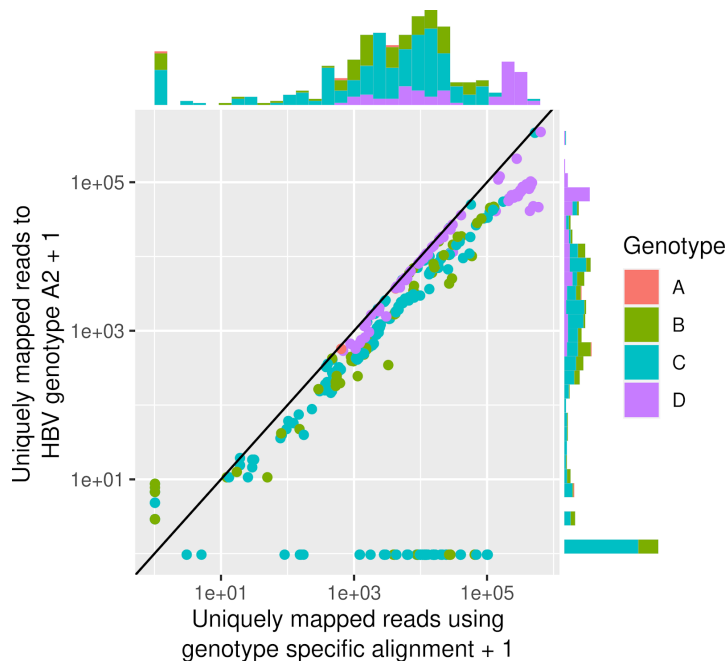

**Fig S8.** Suboptimal alignment of RNA-seq reads to incorrect HBV genotype. A pseudocount of 1 was added to the read counts so that the axes can be shown in log-scale. A total 103 of 449 RNA-seq libraries show no uniquely mapped reads to HBV genotype A2 with 11,476 reads missing on average. The black line indicates a perfect concordance between two variables.



**Table S2.** Alignment statistics of the RNA-seq libraries.

| Library of HBV genotype (replicate) | Raw read pairs | Adapter-trimmed read pairs | Mapped reads (percent of adapter-trimmed read pairs) |               |                  |                      |
|-------------------------------------|----------------|----------------------------|------------------------------------------------------|---------------|------------------|----------------------|
|                                     |                |                            | Multiple loci                                        | Too many loci | Unique           | Unique, deduplicated |
| A2 (1)                              | 37106899       | 37103731                   | 3556481 (9.6%)                                       | 40667 (0.1%)  | 32136169 (86.6%) | 21400178 (57.7%)     |
| A2 (2)                              | 15251776       | 15250842                   | 1378840 (9.0%)                                       | 7998 (0.1%)   | 13205270 (86.6%) | 11029753 (72.3%)     |
| B2 (1)                              | 38476667       | 38473340                   | 3975647 (10.4%)                                      | 18182 (0.1%)  | 32973128 (85.7%) | 22622573 (58.8%)     |
| B2 (2)                              | 17284712       | 17284008                   | 1618680 (9.4%)                                       | 9607 (0.1%)   | 15051431 (87.1%) | 12537297 (72.5%)     |
| C2 (1)                              | 37060457       | 37057565                   | 3377149 (9.1%)                                       | 45873 (0.1%)  | 32538555 (87.8%) | 22283264 (60.1%)     |
| C2 (2)                              | 16697692       | 16697028                   | 1332564 (8.0%)                                       | 6783 (0.0%)   | 14762063 (88.4%) | 11989291 (71.8%)     |
| D3 (1)                              | 35319988       | 35318556                   | 2982199 (8.4%)                                       | 16857 (0.1%)  | 31093385 (88.0%) | 24806308 (70.2%)     |
| D3 (2)                              | 17264080       | 17262771                   | 1349438 (7.8%)                                       | 6606 (0.0%)   | 15202972 (88.1%) | 12561085 (72.8%)     |
| pUC57 (1)                           | 37940141       | 37938002                   | 3501830 (9.2%)                                       | 102293 (0.3%) | 33227680 (87.6%) | 23087037 (60.9%)     |
| pUC57 (2)                           | 17612295       | 17611657                   | 1398322 (7.9%)                                       | 7586 (0.0%)   | 15462152 (87.8%) | 12717607 (72.2%)     |

**Table S3.** Distributions of the deduplicated, uniquely mapped reads.

| Library of HBV genotype (replicate) | Bases passing filter (PF) | PF aligned bases | Genic and intergenic distributions (percent of PF aligned bases) |                       |                       |                      |                     |
|-------------------------------------|---------------------------|------------------|------------------------------------------------------------------|-----------------------|-----------------------|----------------------|---------------------|
|                                     |                           |                  | Ribosomal                                                        | CDS                   | UTR                   | Intronic             | Intergenic          |
| A2 (1)                              | 5417738625                | 5220912565       | 6750<br>(0.0%)                                                   | 2950223954<br>(56.5%) | 1448305082<br>(27.7%) | 481157926<br>(9.2%)  | 341219323<br>(6.5%) |
| A2 (2)                              | 2776824250                | 2635883740       | 4000<br>(0.0%)                                                   | 1518208411<br>(57.6%) | 657872991<br>(25.0%)  | 278418845<br>(10.6%) | 181379887<br>(6.9%) |
| B2 (1)                              | 5727443750                | 5502837275       | 6000<br>(0.0%)                                                   | 3031085315<br>(55.1%) | 1534479844<br>(27.9%) | 552574669<br>(10.0%) | 384692017<br>(7.0%) |
| B2 (2)                              | 3152006375                | 3014745663       | 5500<br>(0.0%)                                                   | 1718370044<br>(57.0%) | 781535562<br>(25.9%)  | 303592100<br>(10.1%) | 211243051<br>(7.0%) |
| C2 (1)                              | 5639239750                | 5433899292       | 6750<br>(0.0%)                                                   | 3112898043<br>(57.3%) | 1516955005<br>(27.9%) | 472662154<br>(8.7%)  | 331377964<br>(6.1%) |
| C2 (2)                              | 3008063000                | 2922664578       | 3250<br>(0.0%)                                                   | 1645081961<br>(56.3%) | 815409053<br>(27.9%)  | 255555983<br>(8.7%)  | 206614503<br>(7.1)  |
| D3 (1)                              | 6237043625                | 6013322317       | 6750<br>(0.0%)                                                   | 3471071102<br>(57.7%) | 1712251181<br>(28.5%) | 492800183<br>(8.2%)  | 337193472<br>(5.6%) |
| D3 (2)                              | 3152469875                | 3055313767       | 3250<br>(0.0%)                                                   | 1698269138<br>(55.6%) | 842967328<br>(27.6%)  | 293568716<br>(9.6%)  | 220505546<br>(7.2%) |
| pUC57 (1)                           | 5846806250                | 5626092532       | 6750<br>(0.0%)                                                   | 3244918197<br>(57.7%) | 1566227765<br>(27.8%) | 494963155<br>(8.8)   | 319977161<br>(5.7%) |
| pUC57 (2)                           | 3191559500                | 3093717169       | 2500<br>(0.0%)                                                   | 1719594807<br>(55.6%) | 866469052<br>(28.0%)  | 297178541<br>(9.6%)  | 210472480<br>(6.8%) |

**Table S4.** Abundance of the reads mapped to the HBV genotypes.

| Library of HBV genotype (replicate) | Deduplicated, uniquely mapped reads |                |
|-------------------------------------|-------------------------------------|----------------|
|                                     | Human genome                        | HBV genome (%) |
| A2 (1)                              | 43341909                            | 200145 (0.5)   |
| A2 (2)                              | 22214594                            | 120648 (0.5)   |
| B2 (1)                              | 45819550                            | 226622 (0.5)   |
| B2 (2)                              | 25216051                            | 141763 (0.6)   |
| C2 (1)                              | 45113918                            | 170852 (0.4)   |
| C2 (2)                              | 24064504                            | 143348 (0.6)   |
| D3 (1)                              | 49896349                            | 120681 (0.2)   |
| D3 (2)                              | 25219759                            | 129444 (0.5)   |
| pUC57 (1)                           | 46774450                            | 0              |
| pUC57 (2)                           | 25532476                            | 0              |

**Table S5.** Abundance of the HBV splice variants identified and quantified using StringTie<sup>a</sup>.

| Genotype | Splice variant | TPM     | Remarks |
|----------|----------------|---------|---------|
| A2       | SP1            | 709.085 | Known   |
| B2       | SP1            | 611     | Known   |
| C2       | SP1            | 338.878 | Known   |
| D3       | SP1            | 662.638 | Known   |
| A2       | SP11           | 5.68785 | Known   |
| B2       | SP11           | 11.8632 | Known   |
| C2       | SP11           | 5.61062 | Known   |
| D3       | SP11           | 4.01303 | Known   |
| A2       | SP13           | 72.9895 | Known   |
| B2       | SP13           | 19.0319 | Known   |
| C2       | SP13           | 54.4802 | Known   |
| D3       | SP13           | 47.3871 | Known   |
| A2       | SP14           | 92.2638 | Known   |
| B2       | SP14           | 41.0153 | Known   |
| C2       | SP14           | 34.5716 | Known   |
| D3       | SP14           | 195.439 | Known   |
| A2       | SP18           | 2.70639 | Known   |
| B2       | SP18           | 1.68298 | Known   |
| C2       | SP18           | 1.67218 | Known   |
| D3       | SP18           | 2.33704 | Known   |
| B2       | SP4            | 7.87638 | Known   |
| B2       | SP5            | 26.9434 | Known   |
| C2       | SP5            | 16.8507 | Known   |
| A2       | SP6            | 27.4146 | Known   |
| B2       | SP6            | 40.7028 | Known   |
| C2       | SP6            | 8.85518 | Known   |
| D3       | SP6            | 47.4892 | Known   |
| A2       | SP7            | 39.4037 | Known   |

|    |       |         |                  |
|----|-------|---------|------------------|
| B2 | SP7   | 1.5067  | Known            |
| C2 | SP7   | 32.5956 | Known            |
| D3 | SP7   | 15.5845 | Known            |
| A2 | SP9   | 227.351 | Known            |
| B2 | SP9   | 234.833 | Known            |
| C2 | SP9   | 115.301 | Known            |
| D3 | SP9   | 34.9994 | Known            |
| B2 | pSP7  | 3.01437 | CCS <sup>b</sup> |
| B2 | pSP8  | 1.90303 | CCS              |
| C2 | pSP8  | 5.78398 | CCS              |
| D3 | pSP8  | 2.97602 | CCS              |
| A2 | pSP9  | 34.3573 | CCS              |
| B2 | pSP9  | 23.2681 | CCS              |
| C2 | pSP9  | 8.09695 | CCS              |
| D3 | pSP9  | 2.63816 | CCS              |
| D3 | pSP10 | 4.47211 | CCS              |
| B2 | pSP11 | 79.6986 | CCS              |
| C2 | pSP11 | 12.7991 | CCS              |
| D3 | pSP11 | 4.62553 | CCS              |
| A2 | pSP12 | 57.0472 | Novel            |
| D3 | pSP12 | 68.1513 | Novel            |

<sup>a</sup>The total RNA levels of A2, B2, C2, and D3 are 4812, 5442, 4708, and 3972 TPM, respectively.

<sup>b</sup>HBV splice variants found in a patient with chronic HBV infection, who has undergone liver transplantation [1]. pSP1-7 were previously used as identifiers for predicted splice variants found in the liver explant and blood samples taken after transplantation during follow-up. We recovered more splice variants in this long-read dataset that were also identified in our short-read dataset and extended the list to pSP12. pSP13 and 14 were only identified in our dataset.

TPM, Transcripts Per kilobase Million mapped reads; CCS, PacBio Circular Consensus Sequencing reads.

**Table S6.** Summary of RNA-seq libraries of HBV studies. See also Fig S7.

| Biological materials | Remarks          | Number of libraries | Median library size | Total uniquely mapped reads to HBV |                                | Uniquely mapped, spliced reads to HBV |                     |
|----------------------|------------------|---------------------|---------------------|------------------------------------|--------------------------------|---------------------------------------|---------------------|
|                      |                  |                     |                     | Median                             | Mean (95% CI)                  | Median                                | Mean (95% CI)       |
| PHH                  | HBV infection    | 83                  | 31,564,144          | 29,824                             | 155,167<br>(118,503 ± 191,831) | 61                                    | 361 (242 ± 480)     |
| Tissue               | HBV+             | 182                 | 19,972,807          | 9,380                              | 25,922<br>(16,061 ± 35,783)    | 6                                     | 97 (31±164)         |
| PVTT                 | HBV+             | 92                  | 15,683,413          | 1,426                              | 4,548<br>(3,314 ± 5,782)       | 1                                     | 17 (4 ± 29)         |
| Tumor                | HBV+             | 129                 | 17,954,621          | 1,854                              | 11,172<br>(6,677 ± 15,666)     | 1                                     | 21 (8 ± 34)         |
| HepaRG               | HBV infection    | 4                   | 39,826,813          | 0                                  | 0                              | 0                                     | 0                   |
| NTCP                 | HBV infection    | 11                  | 28,996,844          | 0                                  | 0                              | 0                                     | 0                   |
| Huh7 (this study)    | HBV transfection | 24                  | 18,356,451          | 247,670                            | 268,863<br>(189,567 ± 348,158) | 832                                   | 1,152 (801 ± 1,504) |

CI, confidence intervals.

**Table S7.** Deletions at the X reading frame or basal core promoter.

| Positions (size, frame)            | Potential splice site motif | Patient ID (genotype): BioSamples                 | Sample (spliced read counts <sup>a</sup> ) | Top BLAST hits                                |
|------------------------------------|-----------------------------|---------------------------------------------------|--------------------------------------------|-----------------------------------------------|
| 1719-1740 (21 bases, in-frame)     | GU-AG                       | P131 (B): SAMN06311478                            | Tissue (41)                                | Novel.                                        |
| 1749-1770 (21 bases, in-frame)     | GA-TT                       | P105 (C): SAMN06311475                            | Tissue (5)                                 | GQ278142.1, KR014092.1, KJ173205.1 [2–4].     |
| 1757-1777 (20 bases, out-of-frame) | GU-AG                       | #20 (C): SAMN04453156, SAMN04453196, SAMN04453176 | Tumor (1561), tissue (889), PVTT (1132)    | EU916221.1, KY470924.1, KR013992.1 [2, 4, 5]. |
|                                    |                             | #17 (C): SAMN04453153                             | Tumor (9)                                  |                                               |
|                                    |                             | #14 (C): SAMN04453170                             | PVTT (22)                                  |                                               |
|                                    |                             | P157 (C): SAMN06311484, SAMN06311470              | Tumor (223), tissue (5)                    |                                               |

<sup>a</sup> BioSamples with at least 5 uniquely mapped, spliced reads to HBV were reported.

**Table S8.** Positions of the HBV 5' and 3' splice sites<sup>a</sup>, MaxEntScan scores, and junction-spanning read counts<sup>b</sup>. See also Fig 3.

| SS | A2       |       |       | B2       |       |       | C2       |       |       | D3       |       |       |
|----|----------|-------|-------|----------|-------|-------|----------|-------|-------|----------|-------|-------|
|    | Position | Score | Reads | Position | Score | Reads | Position | Score | Reads | Position | Score | Reads |
| 3' | 276      | 9.2   | 1024  | 282      | 9.2   | 1358  | 282      | 9.2   | 587   | 282      | 9.2   | 298   |
| 5' | 452      | 9.8   | 107   | 458      | 9.8   | 691   | 458      | 9.8   | 76    | 458      | 9.8   | 31    |
| 3' | 483      | 8.8   | 2833  | 489      | 8.8   | 2405  | 489      | 10.5  | 1121  | 489      | 8.8   | 2482  |
| 3' | 1126     | -2.9  | NA    | 1132     | 4.6   | 10    | 1132     | -3.8  | NA    | 1132     | -3.8  | NA    |
| 3' | 1163     | -7.4  | NA    | 1169     | 1.0   | 47    | 1169     | 1.4   | NA    | 1169     | 1.7   | NA    |
| 3' | 1299     | 8.1   | 107   | 1305     | 8.1   | 97    | 1305     | 5.8   | 19    | 1308     | 4.6   | 17    |
| 3' | 1354     | -6.7  | NA    | 1360     | 4.4   | 64    | 1360     | 4.4   | NA    | 1360     | -5.4  | NA    |
| 3' | 1379     | 3.9   | NA    | 1385     | 4.1   | 484   | 1385     | 5.5   | 57    | 1385     | 3.9   | 14    |
| 5' | 2081     | -6.9  | NA    | 2087     | 7.9   | 163   | 2087     | 7.9   | 233   | 2087     | -8.8  | NA    |
| 3' | 2265     | -10.0 | NA    | 2271     | -7.9  | NA    | 2271     | -9.7  | 103   | 2271     | -9.5  | NA    |
| 3' | 2293     | 0.6   | NA    | 2299     | 6.4   | NA    | 2299     | 9.2   | 12    | 2299     | 0.7   | NA    |
| 3' | 2344     | -3.0  | NA    | 2350     | -3.0  | 59    | 2350     | -3.0  | 58    | 2350     | -3.9  | NA    |
| 5' | 2447     | -1.8  | 3479  | 2447     | -1.8  | 3094  | 2447     | -1.8  | 1560  | 2447     | -1.8  | 2008  |
| 5' | 2471     | 6.0   | 116   | 2471     | 6.0   | 190   | 2471     | 6.0   | 33    | 2471     | 5.9   | 119   |
| 3' | 2562     | -3.6  | NA    | 2562     | 8.9   | NA    | 2562     | 9.2   | 45    | 2562     | -1.4  | NA    |
| 3' | 2935     | 4.3   | 242   | 2935     | 3.9   | 24    | 2935     | 5.4   | 190   | 2902     | 5.6   | 93    |
| 5' | 3018     | 9.8   | 521   | 3018     | 6.0   | 448   | 3018     | 9.8   | 290   | 2985     | 9.5   | 746   |
| 3' | 3202     | -3.5  | 17    | 3202     | 2.8   | 38    | 3202     | -3.5  | NA    | 3169     | 2.9   | NA    |

<sup>a</sup>Coordinates are relative to the unique *EcoRI* restriction site in genotype C2.

<sup>b</sup>Overhang counts as there are a total of 15 3' splice sites sharing five 5' splice sites. Only the splice junctions supported by >9 uniquely mapped reads with >24 overhang bases were included. NA, no data available or read counts <10; SS, splice site.



## References

1. **Betz-Stablein BD, Töpfer A, Littlejohn M, Yuen L, Colledge D, et al.** Single-Molecule Sequencing Reveals Complex Genome Variation of Hepatitis B Virus during 15 Years of Chronic Infection following Liver Transplantation. *J Virol* 2016;90:7171–7183.
2. **Hao R, Xiang K, Peng Y, Hou J, Sun J, et al.** Naturally occurring deletion/insertion mutations within HBV whole genome sequences in HBeAg-positive chronic hepatitis B patients are correlated with baseline serum HBsAg and HBeAg levels and might predict a shorter interval to HBeAg loss and seroconversion during antiviral treatment. *Infect Genet Evol* 2015;33:261–268.
3. **Yin J, Zhang H, He Y, Xie J, Liu S, et al.** Distribution and hepatocellular carcinoma-related viral properties of hepatitis B virus genotypes in Mainland China: a community-based study. *Cancer Epidemiol Biomarkers Prev* 2010;19:777–786.
4. **Li Z, Xie Z, Ni H, Zhang Q, Lu W, et al.** Mother-to-child transmission of hepatitis B virus: evolution of hepatocellular carcinoma-related viral mutations in the post-immunization era. *J Clin Virol* 2014;61:47–54.
5. **Fang Y, Teng X, Xu W-Z, Li D, Zhao H-W, et al.** Molecular characterization and functional analysis of occult hepatitis B virus infection in Chinese patients infected with genotype C. *J Med Virol* 2009;81:826–835.
